# Supplementary material for: Larissa Heart Failure Risk Score and Mode of Death in Acute Heart Failure: Insights from REALITY-AHF
Source: MDPI journal article supplement (doi:10.3390/jcm12113722), 2023-05-28
Supplement: s1 [file s1]

## Suppl. Material

### **Larissa Heart Failure Risk Score and Mode of Death in Acute Heart Failure: Insights From REALITY-AHF**

**Suppl. Table S1.** Comparison of risk of sudden cardiac death (SCD) in patients with LHFRS 0,1 vs. LHFRS 2-4.

| <b>Sudden Cardiac Death</b> |                                                                         |               |              |
|-----------------------------|-------------------------------------------------------------------------|---------------|--------------|
| Groups                      | Adjusted for<br>AHEAD and<br>Angiotensin<br>Receptor Blockers<br><br>HR | 95% CI        | P value      |
| <b>LARISSA Score 0,1</b>    |                                                                         | 1 (Reference) |              |
| <b>LARISSA Score 2-4</b>    | 3.13                                                                    | 1.21-8.13     | <b>0.019</b> |
|                             | Adjusted for<br>AHEAD and<br>Mineralocorticoid<br>Antagonists<br><br>HR | 95% CI        | P value      |
| <b>LARISSA Score 0,1</b>    |                                                                         | 1 (Reference) |              |
| <b>LARISSA Score 2-4</b>    | 3.74                                                                    | 1.47-9.50     | <b>0.006</b> |
|                             | Adjusted for<br>AHEAD and eGFR                                          |               |              |
| <b>LARISSA Score 0,1</b>    |                                                                         | 1 (Reference) |              |
| <b>LARISSA Score 2-4</b>    | 3.19                                                                    | 1.32-7.71     | <b>0.01</b>  |

Patients with LHFRS 2-4 exhibited significantly higher risk for sudden cardiac death (primary endpoint) compared to those with LHFRS 0,1 after adjustment for AHEAD and Angiotensin Receptor Blockers, AHEAD and Mineralocorticoid Antagonists, AHEAD and eGFR. Parameters were carefully selected to avoid overfitting.
